# Supplementary material for: Evaluation of Disability Progression in Multiple Sclerosis via Magnetic-Resonance-Based Deep Learning Techniques
Source: MDPI journal article supplement (doi:10.3390/ijms231810651), 2022-09-13
Supplement: s1 [file s1]

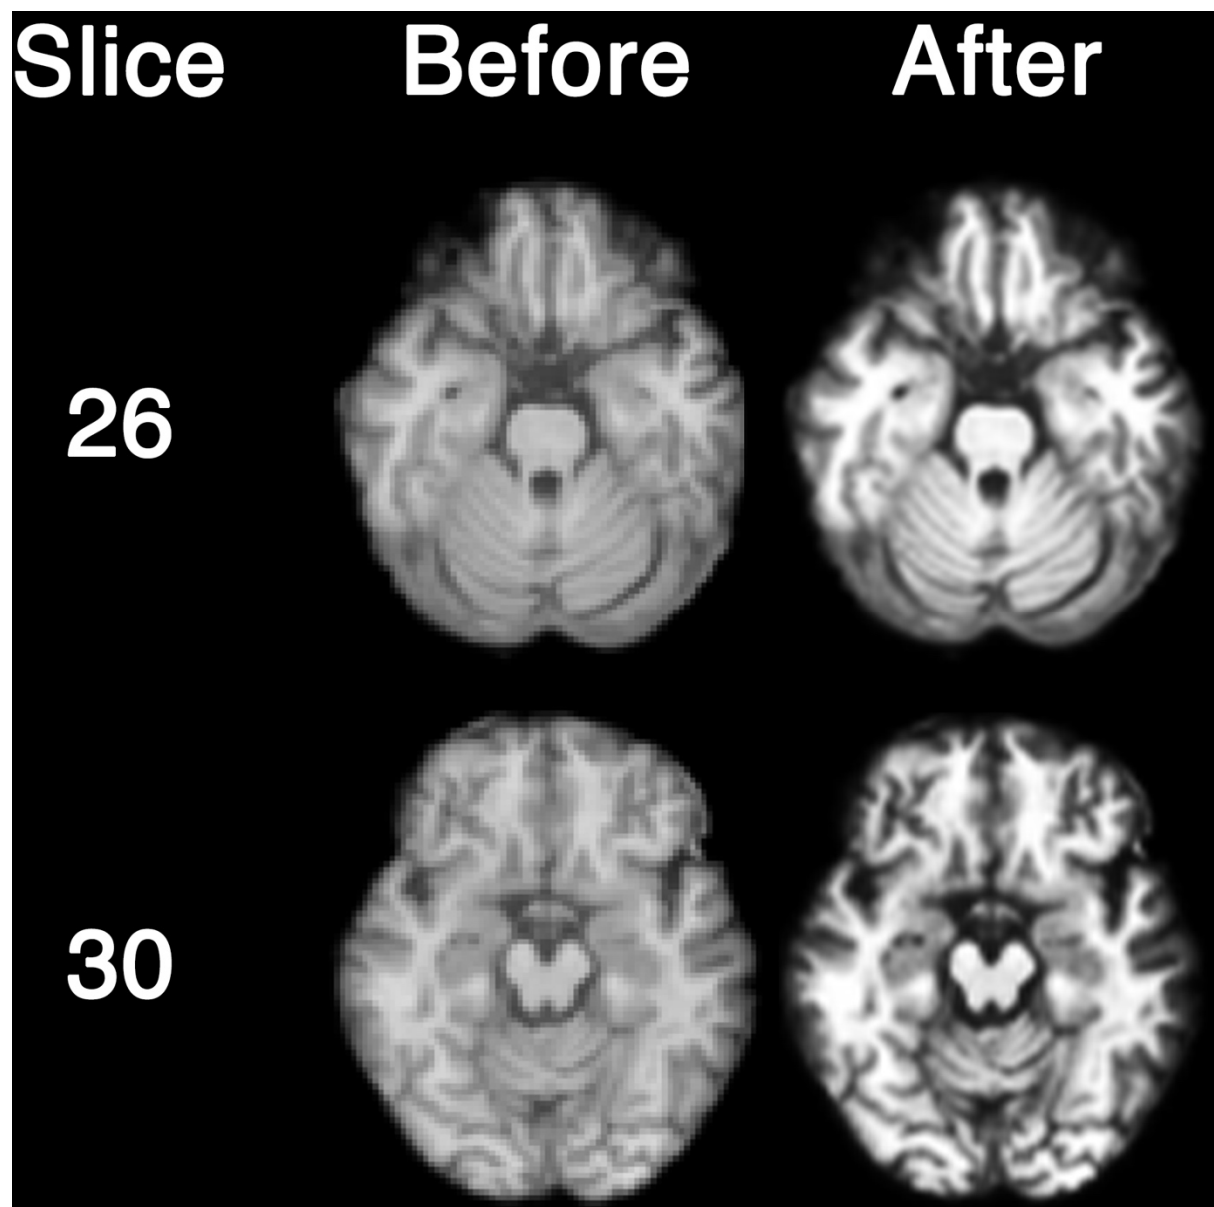

**Figure S1. Contrast-maximized image.** Two examples of slice image before and after having applied the homemade code to maximize contrast. From one subject, we randomly selected slice 26 and 30 for display purpose.
